# Supplementary material for: One-pot synthesis of dual-emitting BSA–Pt–Au bimetallic nanoclusters for fluorescence ratiometric detection of mercury ions and cysteine
Source: Royal Society of Chemistry journal article supplement (doi:10.1039/c5ay01112d), 2015-01-01
Supplement: c5ay01112d1.pdf [file c5ay01112d1.pdf]

*Supporting Information*

**One-pot Synthesis of Dual-emitting BSA-Pt-Au Bimetallic Nanoclusters for  
Fluorescence Ratio-metric Detection of Mercury Ions and Cysteine**

Shou-Nian Ding\* and Yun-Xia Guo

Jiangsu Province Hi-Tech Key Laboratory for Bio-medical Research, School of  
Chemistry and Chemical Engineering, Southeast University, Nanjing 211189, China.

\* Corresponding author. Tel/Fax: +86-25-52090621

E-mail: [snding@seu.edu.cn](mailto:snding@seu.edu.cn)

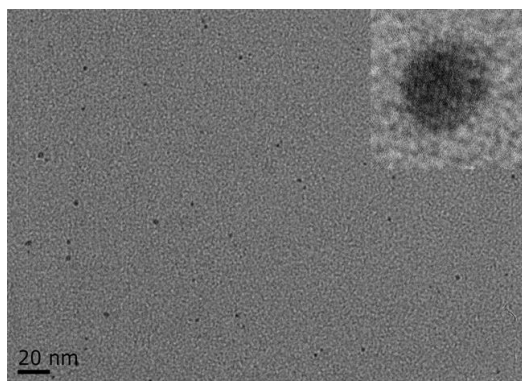

Fig. S1 TEM image of as-prepared BSA-Pt-Au NCs. The inset is the HRTEM of BSA-Pt-Au NCs.

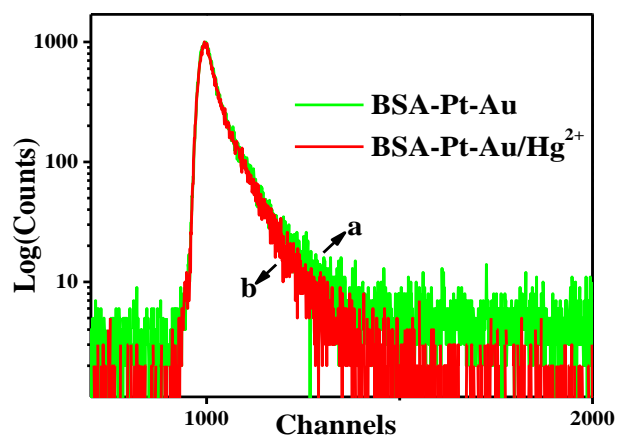

Fig. S2 Fluorescence decay of BSA-Pt-Au NCs in the absence (a) and presence (b) of  $\text{Hg}^{2+}$  ions.

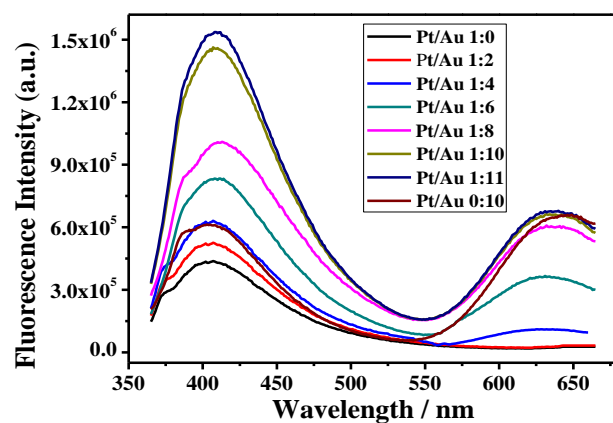

Fig. S3 Fluorescence spectra of as-prepared BSA-Pt-Au NCs with different molar ratios of Pt/Au precursors.

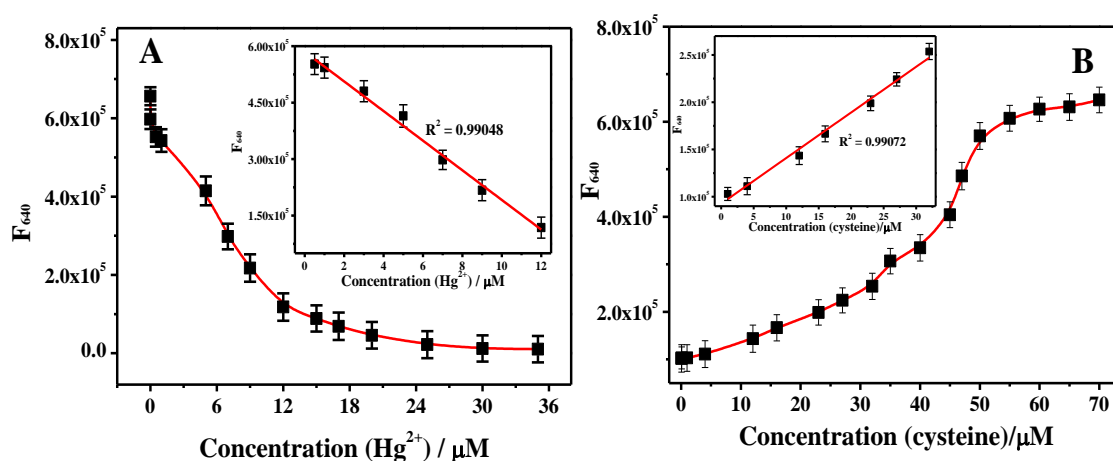

Fig. S4 (A) The fluorescence intensity ( $F_{640}$ ) of BSA-Pt-Au NCs in the presence of different concentrations of  $Hg^{2+}$  ions. (b) The fluorescence intensity ( $F_{640}$ ) of BSA-Pt-Au NCs in the presence of 22  $\mu M$   $Hg^{2+}$  ions and different concentrations of Cys.

Table S1 Comparison of the linear range and detect limit for Hg<sup>2+</sup> ions using different methods.

| <b>Metal ion</b> | <b>Method</b>          | <b>Linear range</b> | <b>Detect limit</b> | <b>Reference</b> |
|------------------|------------------------|---------------------|---------------------|------------------|
| Hg <sup>2+</sup> | Based on AuNCs@FabI    | 1 nM-10 μM          | not shown           | 1                |
| Hg <sup>2+</sup> | Based on BSA-AuNCs     | 25 nM-250 nM        | 7 nM                | 2                |
| Hg <sup>2+</sup> | Based on DHLA-AuNCs    | 1 nM-10 μM          | 0.5 nM              | 3                |
| Hg <sup>2+</sup> | Based on LsGFC         | 10 nM-5 μM          | not shown           | 4                |
| Hg <sup>2+</sup> | Based on BSA-Pt-Au NCs | 0.5nM-22 μM         | 0.2nM               | This work        |

FabI: Drug target bacterial enoyl-ACP reductase;

DHLA: Dihydrolipoic acid;

LsGFC: Lysozyme-stabilized gold fluorescent clusters.

Table S2 Comparison of the novel method for the analysis of cysteine with that of other studies.

| <b>Amino acid</b> | <b>Method</b>                               | <b>Linear range</b> | <b>Detect limit</b> | <b>Reference</b> |
|-------------------|---------------------------------------------|---------------------|---------------------|------------------|
| cysteine          | Based on PI-Ag NCs                          | 0.1-5.0 μM          | not shown           | 5                |
| cysteine          | Based on CdTe/CdS quantum                   | 1.0–20 μM           | 0.28 μM             | 6                |
| cysteine          | Based on Surfactant-capped AgNPs            | 1.5–6.0 μM          | 0.05 μM             | 7                |
| cysteine          | Based on BSA-Pt-Au NCs and Hg <sup>2+</sup> | 0.1-50 μM           | 0.04 μM             | This work        |

PI-Ag NCs: Polyionosinic acid-Ag NCs;

Surfactant-capped AgNPs: Fluorosurfactant-capped silver nanoparticles.

Table S3 Analytical results for the determination of Hg<sup>2+</sup> or cysteine in urine and serum samples using the BSA-Pt-Au NCs.

| sample  | Substances       | Added Substances (μM) | Measured (μM) | Recovery (%) |
|---------|------------------|-----------------------|---------------|--------------|
| Urine 1 | Hg <sup>2+</sup> | 20                    | 20.13         | 100.65       |
|         | cysteine         | 50                    | 50.54         | 101.08       |
| Urine 2 | Hg <sup>2+</sup> | 20                    | 19.93         | 99.65        |
|         | cysteine         | 50                    | 50.82         | 101.64       |
| Urine 3 | Hg <sup>2+</sup> | 20                    | 20.18         | 100.90       |
|         | cysteine         | 50                    | 49.76         | 99.52        |
| Serum 1 | Hg <sup>2+</sup> | 20                    | 20.11         | 100.55       |
|         | cysteine         | 50                    | 51.25         | 102.50       |
| Serum 2 | Hg <sup>2+</sup> | 20                    | 19.87         | 99.35        |
|         | cysteine         | 50                    | 50.13         | 100.26       |
| Serum 3 | Hg <sup>2+</sup> | 20                    | 20.08         | 100.4        |
|         | cysteine         | 50                    | 50.26         | 100.52       |

## Notes and reference

1. H. Ding, H. Li, P. Liu, J. K. Hiltunen, Y. Wu, Z. Chen and J. Shen, *Microchim. Acta*, 2014, **181**, 1029-1034.
2. P. C. Chen, C. K. Chiang and H. T. Chang, *J. Nanopart. Res.*, 2012, **15**, 1336-1345.
3. L. Shang, L. X. Yang, F. Stockmar, R. Popescu, V. Trouillet, M. Bruns, D. Gerthsen and G. U. Nienhaus, *Nanoscale*, 2009, **4**, 4155-4160.
4. H. Wei, Z. Wang, L. Yang, S. Tian, C. Hou and Y. Lu, *The Analyst*, 2010, **135**, 1406.
5. D. L. Zhou, H. Huang, J. N. Zheng, J. R. Chen, J. J. Feng and A. J. Wang, *Analytical Methods*, 2013, **5**, 6076.
6. Q. Mu, Y. Li, Y. Ma and X. Zhong, *The Analyst*, 2014, **139**, 996-999.
7. M. Zhang and B. C. Ye, *Anal. Chem.*, 2011, **83**, 1504-1509.
